# Supplementary material for: Self-Assembled Tetrahedral Framework Nucleic Acid Mediated Tumor-Associated Macrophages Reprogramming and Enhancing Cancer Immunotherapy
Source: Research Square preprint supplement (doi:10.21203/rs.3.rs-373672/v1), 2021-04-01
Supplement: Supplementary file 1 [file 77344f6e0b906c66e19025c6.docx]

**Supplementary Material**

**Self-assembled Tetrahedral Framework Nucleic Acid Mediated Tumor-associated Macrophages Reprogramming and**

**Enhancing Cancer Immunotherapy**

Husun Qian1, Yixin Fu1, Minkang Guo2, Wu Yang2, Dian Zhang1, Ting Zhou1, Wenli Fang1, Mengli Yao1, He Shi1, Chengsen, Chai1, Wei Cheng3, Shijia Ding1, Tingmei Chen1🖂

1. Key Laboratory of Clinical Laboratory Diagnostics (Ministry of Education), College of Laboratory Medicine, Chongqing Medical University, Chongqing 400016, P.R. China

2. Department of Orthopedics, The First Affiliated Hospital of Chongqing Medical University, Chongqing 400016, China

3. The Center for Clinical Molecular Medical Detection, The First Affiliated Hospital of Chongqing Medical University, Chongqing 400016, China

🖂 Corresponding author: Tingmei Chen; E-mail: tingmeichen@cqmu.edu.cn

**Table S1.** Oligonucleotide sequences used in this work

| Name | Sequence (5’ – 3’) |
| --- | --- |
| S1 | GTCTGAGGCAGTTGAGAGATCTCGAACATTCCTTTTTTTTTTTTTTTTTTTTT |
| S2 | TAAGTCTGAAGATCCATTTATCACCAGCTGCTGCACGCCATAGTAGACGTATCACCTGTCCTTTTTTTTTTTTTTTTTTTTT |
| S3 | AGCTACTTGCTACACGAGGATCTTCAGACTTAGGAATGTTCGAGATCACATGCGAGGACTCGGTCCAATACCGTACTAACGATTACAGATCAATTTTTTTTTTTTTTTTTTTTT |
| S4 | CAGCTGGTGATAAAACGTGTAGCAAGTAGCTTTGATCTGTAATCGACTCTACGGGAAGAGCTTTTTTTTTTTTTTTTTTTTT |
| S5 | ATGCCCATCCGGCTCACTACTATGGCGTGCAGTTTTTTTTTTTTTTTTTTTTT |
| S6 | CGAGTCCTCGCATGACTCAACTGCCTCAGACGGACAGGTGATACGAGAGCCGGATGGGCATGCTCTTCCCGTAGAGATAGTACGGTATTGGACTTTTTTTTTTTTTTTTTTTTT |
| CpG-Overhang | TCCATGACGTTCCTGATGCTTTTTTTTTAAAAAAAAAAAAAAAAAAAAA |
| F-CpG | FAM-TCCATGACGTTCCTGATGCTTTTTTTTTAAAAAAAAAAAAAAAAAAAAA |
| siRNA (SS)-CpG | TCCATGACGTTCCTGATGCT-linker-CAACAAGUCCUCUGCCAAAGTT |
| siRNA (AS)-Overhang | AAAAAAAAAAAAAAAAAAAAA-linker-CUUUGGCAGAGGACUUGUUGTT |

The red is the RNA bases.

**Table S2.** Primer sequences for quantitative real-time PCR.

| Name | Sequence (5’ – 3’) |
| --- | --- |
| Il-6 | Forward primer: TACCACTTCACAAGTCGGAGGC  Reverse primer: CTGCAAGTGCATCATCGTTGTTC |
| Il-12b | Forward primer: TTGAACTGGCGTTGGAAGCACG  Reverse primer: CCACCTGTGAGTTCTTCAAAGGC |
| Tnfa | Forward primer: GGTGCCTATGTCTCAGCCTCTT  Reverse primer: GCCATAGAACTGATGAGAGGGAG |
| Gapdh | Forward primer: CATCACTGCCACCCAGAAGACTG  Reverse primer: ATGCCAGTGAGCTTCCCGTTCAG |


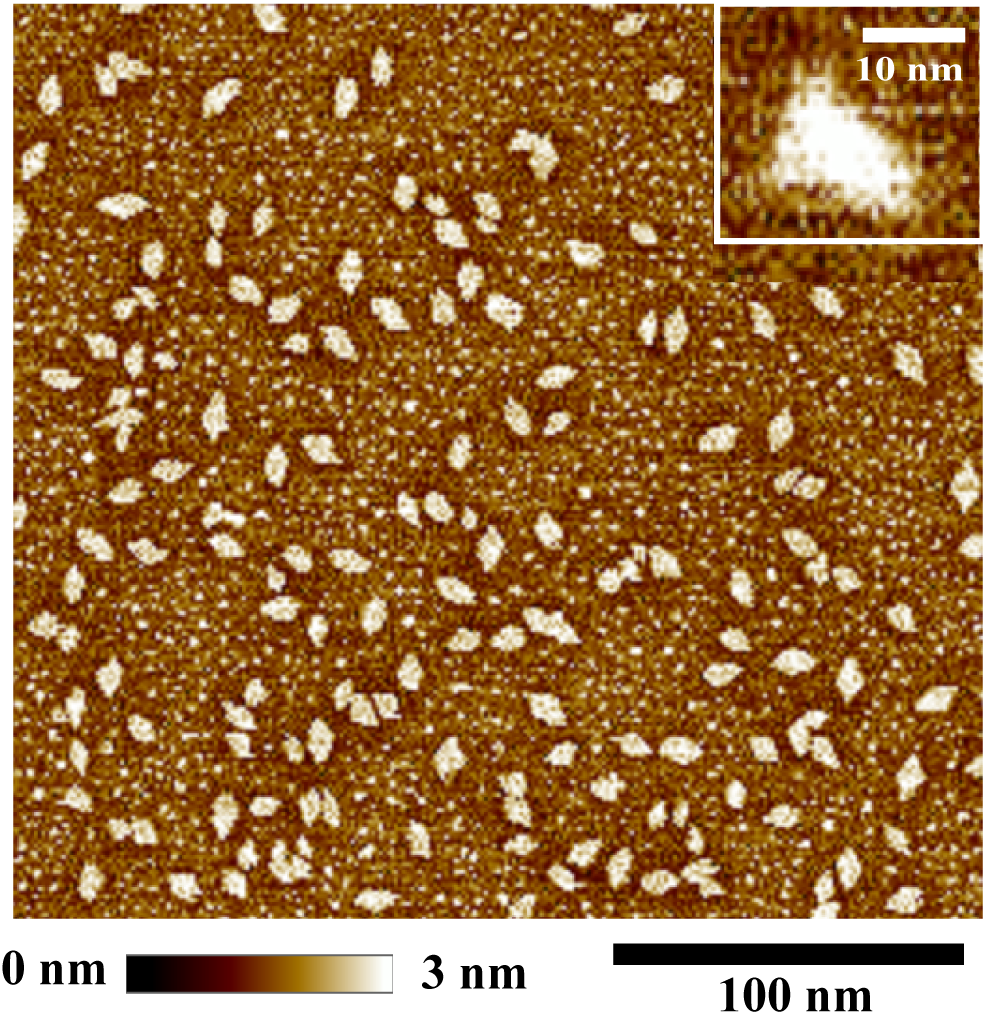


**Figure S1.** Atomic force microscope (AFM) images of CpG-siRNA-tFNA.


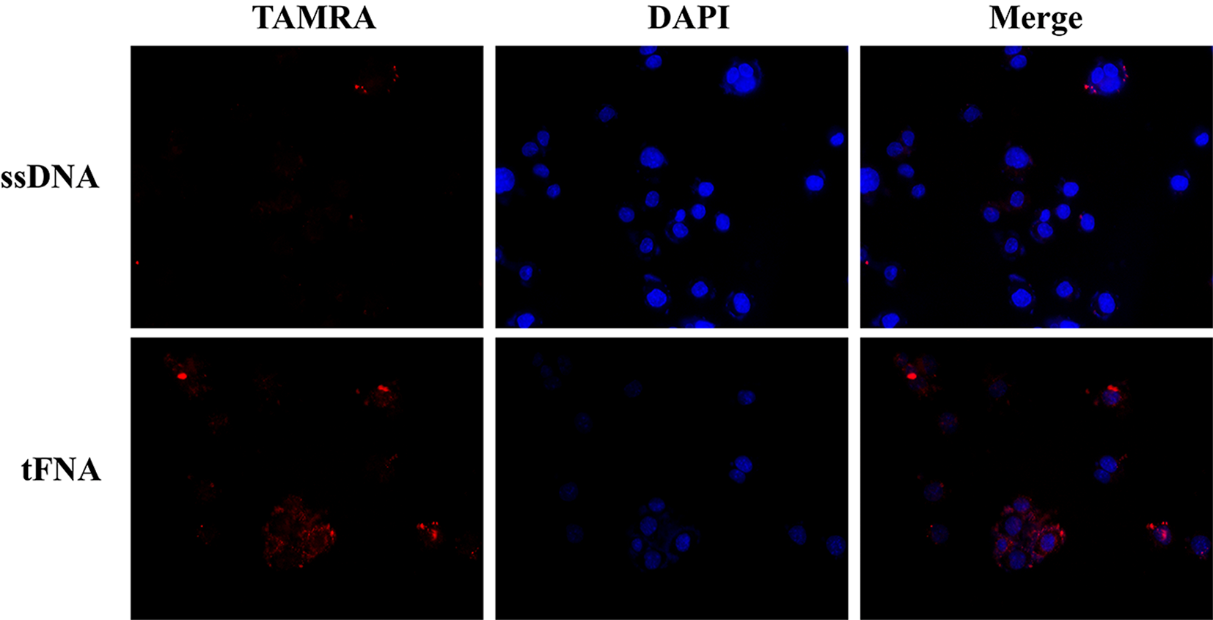


**Figure S2.** Fluorescence microscope imaging analysis the difference of cellular uptake between CpG and CpG-tFNA.


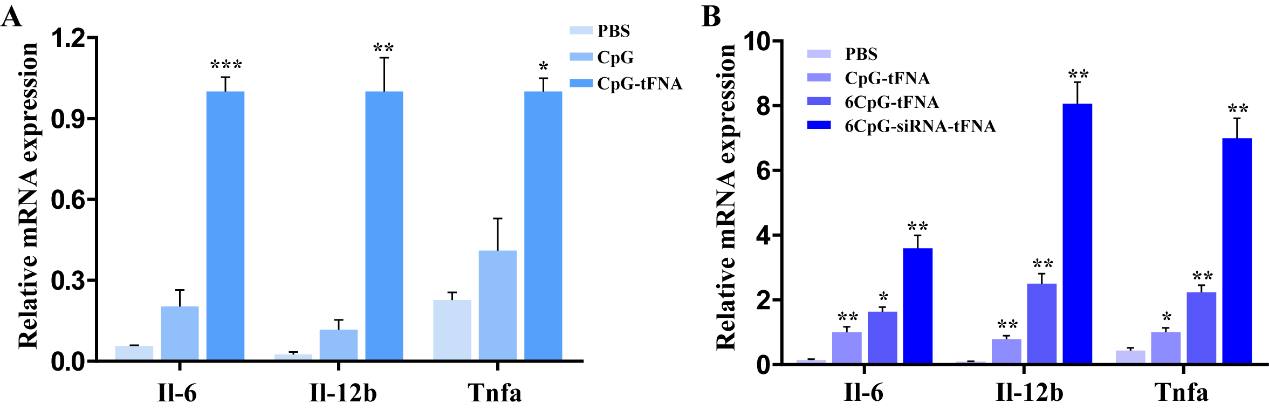


**Figure S3.** The qPCR results of the proinflammatory cytokine levels.


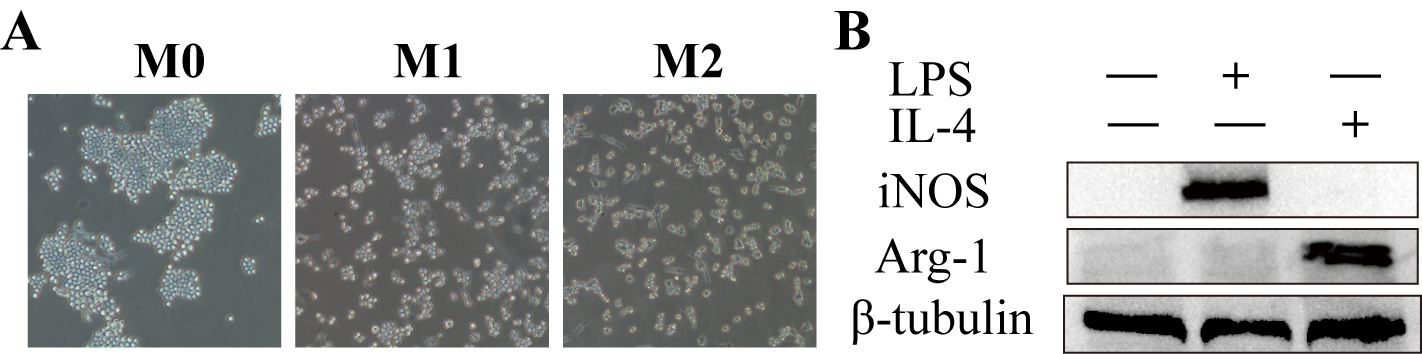


**Figure S4.** (A) The pictures of microscope showed M0, M1 and M2 phenotype polarization morphological changes. (B) Western blot analysis proteins expression involved in macrophages markers in RAW264.7 cells.
